# Supplementary material for: Wearable Devices for Biofeedback Rehabilitation: A Systematic Review and Meta-Analysis to Design Application Rules and Estimate the Effectiveness on Balance and Gait Outcomes in Neurological Diseases
Source: MDPI journal article supplement (doi:10.3390/s21103444), 2021-05-15
Supplement: s1 [file s1]

|                                                                                                                    |                                                                                                                                                                                                                                                                                                                                                                                                                                                                                                                                                                                                                                                                                                                                                                                                                                     |
|--------------------------------------------------------------------------------------------------------------------|-------------------------------------------------------------------------------------------------------------------------------------------------------------------------------------------------------------------------------------------------------------------------------------------------------------------------------------------------------------------------------------------------------------------------------------------------------------------------------------------------------------------------------------------------------------------------------------------------------------------------------------------------------------------------------------------------------------------------------------------------------------------------------------------------------------------------------------|
| <b>PUBMED</b>                                                                                                      | (Humans[mh] OR Adult[mh] OR Nervous System Diseases[mh] OR Gait Disorders, Neurologic[mh] AND (Neurofeedback[mh] OR Feedback,Sensory[mh] OR feedback[tiab] OR Biofeedback[tiab] OR Cues[mh] OR Physical Therapy modalities[mh] OR Rehabilitation[mh] OR Rehab*[tiab] OR Conservative treatment[mh] OR Training[tiab] OR Exercise*[tiab]) AND (Wearable Electronic Devices[mh] OR wearable[tiab] OR Device[tiab] OR Accelerometry[mh] OR Acceleromet*[tiab] OR gyroscope*[tiab] OR sensor*[tiab] OR shoe*[tiab] OR Insole*[tiab]) AND (Walking[mh] OR Walk*[tiab] OR Ambulation[tiab] OR Gait[mh] OR Gait[tiab] OR Postural Balance[mh] OR Balance[tiab] OR Equilibrium[tiab] OR Recovery of function[mh] OR Motor Activity[mh]) AND (Randomized controlled trial[pt] OR randomized controlled trials as topic[mh] OR random*[tiab]) |
| <b>COCHRANE</b>                                                                                                    | (Humans OR Adult OR Nervous System Diseases OR Gait Disorders) AND (Neurofeedback OR Feedback OR Biofeedback OR Cues OR Physical Therapy OR Rehabilitation OR Conservative treatment OR Training OR Exercise) AND (Wearable Electronic Devices OR Device OR Accelerometry OR gyroscope OR sensor OR shoe OR Insole) AND (Walking OR Walk* OR Ambulation OR Gait OR Postural Balance OR Balance OR Equilibrium OR Recovery of function OR Motor Activity)                                                                                                                                                                                                                                                                                                                                                                            |
| <b>WEB OF SCIENCE – All Databases - (MEDLINE, Web of science Core Collection) – Document Type “Clinical Trial”</b> | (Humans OR Adult OR Nervous System Diseases OR Gait Disorders) AND (Neurofeedback OR Feedback OR Biofeedback OR Cues OR Physical Therapy OR Rehabilitation OR Conservative treatment OR Training OR Exercise) AND (Wearable Electronic Devices OR Device OR Accelerometry OR gyroscope OR sensor OR shoe OR Insole) AND (Walking OR Walk* OR Ambulation OR Gait OR Postural Balance OR Balance OR Equilibrium OR Recovery of function OR Motor Activity)                                                                                                                                                                                                                                                                                                                                                                            |
| <b>PEDRO:</b> Simple search Title, Abstract – Filtro “clinical trials”                                             | Neurologic, Feedback, Device, Accelerometry, Gyroscope, Sensor, Balance, Gait                                                                                                                                                                                                                                                                                                                                                                                                                                                                                                                                                                                                                                                                                                                                                       |

**Table S1** – Search strategies

| First Author[Ref]               | WDBR intervention                                                                                                                                                           | Control intervention                                                                                                                                      | Outcome                      | Level of significance between groups (p-value)                     |
|---------------------------------|-----------------------------------------------------------------------------------------------------------------------------------------------------------------------------|-----------------------------------------------------------------------------------------------------------------------------------------------------------|------------------------------|--------------------------------------------------------------------|
| Ginis et al. <sup>39</sup>      | EG: received weekly home visit and patients were instructed to walk with the CUPID system                                                                                   | CG: received weekly home visit by the researcher who gave advice on gait and freezing and patients were instructed to walk without using the CUPID system | 2MWT                         | no significant differences                                         |
| Byl et al. <sup>36</sup>        | EG: visual kinematic feedback on the computer screen during progressive and task oriented balance and gait training activities                                              | CG: balance and gait training activities                                                                                                                  | 5TSS                         | no significant differences                                         |
| Byl et al. <sup>36</sup>        | EG: visual kinematic feedback on the computer screen during progressive and task oriented balance and gait training activities                                              | CG: balance and gait training activities                                                                                                                  | 6MWT                         | no significant differences                                         |
| Carpinella et al. <sup>37</sup> | EG: balance and gait functional tailored exercises using Gamepad System                                                                                                     | CG: personalized balance and gait exercises defined by the clinical staff                                                                                 | ABC                          | no significant differences                                         |
| Intiso et al. <sup>46</sup>     | EG: EMG Biofeedback and Physical Therapy (standard exercise bobath, facilitation and inhibition techniques, neurofacilitatory techniques)                                   | CG: Physical therapy (standard exercise bobath, facilitation and inhibition techniques, neurofacilitatory techniques)                                     | ankle angle (heel contact)   | no significant differences                                         |
| Cozean et al. <sup>45</sup>     | EG1: EMG biofeedback during static and dynamic activities<br>EG2: FES during static and dynamic activities<br>EG3: EMG biofeedback+FES during static and dynamic activities | CG: conventional physical therapy                                                                                                                         | ankle angle (swing phase)    | significant differences (p = 0.02) in favour of EG3                |
| Intiso et al. <sup>46</sup>     | EG: EMG Biofeedback and Physical Therapy (standard exercise bobath, facilitation and inhibition techniques, neurofacilitatory techniques)                                   | CG: Physical therapy (standard exercise bobath, facilitation and inhibition techniques, neurofacilitatory techniques)                                     | ankle angle (swing phase)    | significant differences (p < 0.02) in favour of experimental group |
| Jonsdottir et al. <sup>47</sup> | EG=Task oriented Gait Training with EMG-BFB device                                                                                                                          | CG= conventional physical therapy (at least 15 minutes of gait training in each session)                                                                  | ankle power peak at push-off | significant differences (p = 0.16) in favour of experimental group |

|                                           |                                                                                                                                           |                                                                                                                       |                 |                                                                         |
|-------------------------------------------|-------------------------------------------------------------------------------------------------------------------------------------------|-----------------------------------------------------------------------------------------------------------------------|-----------------|-------------------------------------------------------------------------|
| <b>Intiso et al.<sup>46</sup></b>         | EG: EMG Biofeedback and Physical Therapy (standard exercise bobath, facilitation and inhibition techniques, neurofacilitatory techniques) | CG: Physical therapy (standard exercise bobath, facilitation and inhibition techniques, neurofacilitatory techniques) | Basmajian scale | significant differences ( $p < 0.01$ ) in favour of experimental group  |
| <b>Byl et al.<sup>36</sup></b>            | EG: visual kinematic feedback on the computer screen during progressive and task oriented balance and gait training activities            | CG: balance and gait training activities                                                                              | BBS             | no significant differences                                              |
| <b>van den Heuvel et al.<sup>40</sup></b> | EG: interactive balance games with explicit augmented visual feedback                                                                     | CG: conventional balance training recommended by the guidelines for physical therapy.                                 | BBS             | no significant differences                                              |
| <b>Azerpaikan et al.<sup>35</sup></b>     | EG: Neurofeedback training with EEG generator                                                                                             | CG: Sham Neuro Feedback Training using sham EEG generator                                                             | BBS             | significant differences ( $p = 0.00$ ) in favour of experimental group  |
| <b>Lee et al.<sup>50</sup></b>            | EG: neurofeedback training                                                                                                                | CG: pseudo-neurofeedback training (sham neurofeedback)                                                                | cadence         | significant differences ( $p < 0.05$ ) in favour of experimental group  |
| <b>El-Tamawy et al.<sup>38</sup></b>      | EG: Individually designed physiotherapy and traditional gait training plus treadmill training with vibratory stimuli                      | CG: individually designed physiotherapy traditional gait training including instructions to walk with long steps.     | cadence         | significant differences ( $p = 0.001$ ) in favour of experimental group |
| <b>Schwenk et al.<sup>54</sup></b>        | EG: postural balance exercises during standing using biofeedback training                                                                 | CG: No training;                                                                                                      | CoM area EC     | no significant differences                                              |
| <b>Schwenk et al.<sup>54</sup></b>        | EG: postural balance exercises during standing using biofeedback training                                                                 | CG: No training;                                                                                                      | CoM area EO     | significant differences ( $p = 0.04$ ) in favour of experimental group  |
| <b>Schwenk et al.<sup>54</sup></b>        | EG: postural balance exercises during standing using biofeedback training                                                                 | CG: No training;                                                                                                      | CoM sway AP-EC  | no significant differences                                              |
| <b>Schwenk et al.<sup>54</sup></b>        | EG: postural balance exercises during standing using biofeedback training                                                                 | CG: No training;                                                                                                      | CoM sway AP-EO  | significant differences ( $p = 0.02$ ) in favour of experimental group  |
| <b>Schwenk et al.<sup>54</sup></b>        | EG: postural balance exercises during standing using biofeedback training                                                                 | CG: No training;                                                                                                      | CoM sway ML-EC  | no significant differences                                              |
| <b>Schwenk et al.<sup>54</sup></b>        | EG: postural balance exercises during standing using biofeedback training                                                                 | CG: No training;                                                                                                      | CoM sway ML-EO  | significant differences ( $p = 0.04$ ) in favour of experimental group  |
| <b>Carpinella et al.<sup>37</sup></b>     | EG: balance and gait functional tailored exercises using Gamepad System                                                                   | CG: personalized balance and gait exercises defined by the clinical staff                                             | COP AP sway     | no significant differences                                              |

|                                       |                                                                                                                                                                |                                                                                    |                 |                                                                                              |
|---------------------------------------|----------------------------------------------------------------------------------------------------------------------------------------------------------------|------------------------------------------------------------------------------------|-----------------|----------------------------------------------------------------------------------------------|
| <b>Carpinella et al.<sup>37</sup></b> | EG: balance and gait functional tailored exercises using Gamepad System                                                                                        | CG: personalized balance and gait exercises defined by the clinical staff          | COP ML sway     | significant differences ( $p = 0.003$ ) in favour of experimental group                      |
| <b>Choi et al.<sup>44</sup></b>       | EG: gait intervention with auditory feedback                                                                                                                   | CG= general gait intervention                                                      | COP lenght EC   | significant differences ( $p < 0.05$ ) in favour of experimental group                       |
| <b>Cha et al.<sup>42</sup></b>        | EG1: gait training with active weight bearing on the paretic heel with auditory feedback<br>EG2: gait training with auditory feedback from paretic metatarsals | CG: gait intervention                                                              | COP lenght EC   | no significant differences                                                                   |
| <b>Choi et al.<sup>44</sup></b>       | EG: gait intervention with auditory feedback                                                                                                                   | CG= general gait intervention                                                      | COP lenght EO   | significant differences ( $p < 0.05$ ) in favour of experimental group                       |
| <b>Cha et al.<sup>42</sup></b>        | EG1: gait training with active weight bearing on the paretic heel with auditory feedback<br>EG2: gait training with auditory feedback from paretic metatarsals | CG: gait intervention                                                              | COP lenght EO   | significant differences ( $p < 0.017$ ) in favour of experimental groups compared to control |
| <b>Lupo et al.<sup>51</sup></b>       | EG: balance training with RIABLO biofeedback system using a video interface.                                                                                   | CG: conventional balance training without the use of the RIABLO biofeedback system | COP length EC   | significant differences ( $p = 0.0002$ ) in favour of experimental group                     |
| <b>Lupo et al.<sup>51</sup></b>       | EG: balance training with RIABLO biofeedback system using a video interface.                                                                                   | CG: conventional balance training without the use of the RIABLO biofeedback system | COP length EO   | significant differences ( $p < 0.0001$ ) in favour of experimental group                     |
| <b>Cha et al.<sup>42</sup></b>        | EG1: gait training with active weight bearing on the paretic heel with auditory feedback<br>EG2: gait training with auditory feedback from paretic metatarsals | CG: gait intervention                                                              | COP velocity EC | no significant differences                                                                   |
| <b>Cha et al.<sup>42</sup></b>        | EG1: gait training with active weight bearing on the paretic heel with auditory feedback<br>EG2: gait training with auditory feedback from paretic metatarsals | CG: gait intervention                                                              | COP velocity EO | significant differences ( $p < 0.017$ ) in favour of experimental groups compared to control |
| <b>Byl et al.<sup>36</sup></b>        | EG: visual kinematic feedback on the computer screen during progressive and task oriented balance and gait training activities                                 | CG: balance and gait training activities                                           | DGI             | no significant differences                                                                   |

|                                           |                                                                                                                                                                |                                                                                                                                                           |                          |                                                                          |
|-------------------------------------------|----------------------------------------------------------------------------------------------------------------------------------------------------------------|-----------------------------------------------------------------------------------------------------------------------------------------------------------|--------------------------|--------------------------------------------------------------------------|
| <b>Ginis et al.<sup>39</sup></b>          | EG: received weekly home visit and patients were instructed to walk with the CUPID system                                                                      | CG: received weekly home visit by the researcher who gave advice on gait and freezing and patients were instructed to walk without using the CUPID system | double support time      | no significant differences                                               |
| <b>Ginis et al.<sup>39</sup></b>          | EG: received weekly home visit and patients were instructed to walk with the CUPID system                                                                      | CG: received weekly home visit by the researcher who gave advice on gait and freezing and patients were instructed to walk without using the CUPID system | double support time - DT | no significant differences                                               |
| <b>Ginis et al.<sup>39</sup></b>          | EG: received weekly home visit and patients were instructed to walk with the CUPID system                                                                      | CG: received weekly home visit by the researcher who gave advice on gait and freezing and patients were instructed to walk without using the CUPID system | FES-I                    | no significant differences                                               |
| <b>Schwenk et al.<sup>54</sup></b>        | EG: postural balance exercises during standing using biofeedback training                                                                                      | CG: No training;                                                                                                                                          | FES-I                    | significant differences (p = 0.02) in favour of experimental group       |
| <b>van den Heuvel et al.<sup>40</sup></b> | EG: interactive balance games with explicit augmented visual feedback                                                                                          | CG: conventional balance training recommended by the guidelines for physical therapy.                                                                     | FES-I                    | no significant differences                                               |
| <b>Cha et al.<sup>42</sup></b>            | EG1: gait training with active weight bearing on the paretic heel with auditory feedback<br>EG2: gait training with auditory feedback from paretic metatarsals | CG: gait intervention                                                                                                                                     | FGA                      | significant differences (p < 0.017) in favour of EG2 compared to control |
| <b>Choi et al.<sup>44</sup></b>           | EG: gait intervention with auditory feedback                                                                                                                   | CG= general gait intervention                                                                                                                             | FGA                      | significant differences (p < 0.05) in favour of experimental group       |
| <b>Byl et al.<sup>36</sup></b>            | EG: visual kinematic feedback on the computer screen during progressive and task oriented balance and gait training activities                                 | CG: balance and gait training activities                                                                                                                  | FOG-Q                    | no significant differences                                               |
| <b>Carpinella et al.<sup>37</sup></b>     | EG: balance and gait functional tailored exercises using Gamepad System                                                                                        | CG: personalized balance and gait exercises defined by the clinical staff                                                                                 | FOG-Q                    | no significant differences                                               |
| <b>Ginis et al.<sup>39</sup></b>          | EG: received weekly home visit and patients were instructed to walk with the CUPID system                                                                      | CG: received weekly home visit by the researcher who gave advice on gait and freezing and patients were instructed to walk without using the CUPID system | FSST                     | no significant differences                                               |

|                                           |                                                                                                                                                                             |                                                                                                                                                           |                 |                                                                     |
|-------------------------------------------|-----------------------------------------------------------------------------------------------------------------------------------------------------------------------------|-----------------------------------------------------------------------------------------------------------------------------------------------------------|-----------------|---------------------------------------------------------------------|
| <b>Byl et al.<sup>36</sup></b>            | EG: visual kinematic feedback on the computer screen during progressive and task oriented balance and gait training activities                                              | CG: balance and gait training activities                                                                                                                  | gait speed      | no significant differences                                          |
| <b>Cho et al.<sup>43</sup></b>            | EG: visual biofeedback tracking training                                                                                                                                    | CG: not Reported                                                                                                                                          | gait speed      | no significant differences                                          |
| <b>Cozean et al.<sup>45</sup></b>         | EG1: EMG biofeedback during static and dynamic activities<br>EG2: FES during static and dynamic activities<br>EG3: EMG biofeedback+FES during static and dynamic activities | CG: conventional physical therapy                                                                                                                         | gait speed      | significant differences (p = 0.04) in favour of EG3                 |
| <b>El-Tamawy et al.<sup>38</sup></b>      | EG: Individually designed physiotherapy and traditional gait training plus treadmill training with vibratory stimuly                                                        | CG: individually designed physiotherapy traditional gait training including instructions to walk with long steps.                                         | gait speed      | significant differences (p = 0.001) in favour of experimental group |
| <b>Jonsdottir et al.<sup>47</sup></b>     | EG=Task oriented Gait Training with EMG-BFB device                                                                                                                          | CG= conventional physical therapy (at least 15 minutes of gait training in each session)                                                                  | gait speed      | significant differences (p = 0.004) in favour of experimental group |
| <b>Lee et al.<sup>50</sup></b>            | EG: neurofeedback training                                                                                                                                                  | CG: pseudo-neurofeedback training (sham neurofeedback)                                                                                                    | gait speed      | significant differences (p < 0.05) in favour of experimental group  |
| <b>Mandel et al.<sup>52</sup></b>         | EG1:EMG biofeedback training<br>EG2: EMG biofeedback followed by rhythmic positional biofeedback                                                                            | CG: nothing                                                                                                                                               | gait speed      | significant differences (p = 0.02) in favour of EG2                 |
| <b>van den Heuvel et al.<sup>40</sup></b> | EG: interactive balance games with explicit augmented visual feedback                                                                                                       | CG: conventional balance training recommended by the guidelins for physical therapy.                                                                      | gait speed      | no significant differences                                          |
| <b>Intiso et al.<sup>46</sup></b>         | EG: EMG Biofeedback and Physical Therapy (standard exercise bobath, facilitation and inhibition techniques, neurofacilitatory techniques)                                   | CG: Physical therapy (standard exercise bobath, facilitation and inhibition techniques, neurofacilitatory techniques)                                     | gait speed      | no significant differences                                          |
| <b>Ginis et al.<sup>39</sup></b>          | EG: received weekly home visit and patients were instructed to walk with the CUPID system                                                                                   | CG: received weekly home visit by the researcher who gave advice on gait and freezing and patients were instructed to walk without using the CUPID system | gait speed - DT | no significant differences                                          |

|                                 |                                                                                                                                                                             |                                                                                                                                                           |                                                     |                                                                     |
|---------------------------------|-----------------------------------------------------------------------------------------------------------------------------------------------------------------------------|-----------------------------------------------------------------------------------------------------------------------------------------------------------|-----------------------------------------------------|---------------------------------------------------------------------|
| Schwenk et al. <sup>54</sup>    | EG: postural balance exercises during standing using biofeedback training                                                                                                   | CG: No training                                                                                                                                           | gait speed-fast                                     | no significant differences                                          |
| Schwenk et al. <sup>54</sup>    | EG: postural balance exercises during standing using biofeedback training                                                                                                   | CG: No training                                                                                                                                           | gait speed-normal                                   | no significant differences                                          |
| Schwenk et al. <sup>54</sup>    | EG: postural balance exercises during standing using biofeedback training                                                                                                   | CG: No training                                                                                                                                           | gait stride time variability-fast                   | no significant differences                                          |
| Schwenk et al. <sup>54</sup>    | EG: postural balance exercises during standing using biofeedback training                                                                                                   | CG: No training                                                                                                                                           | gait stride time variability-normal                 | no significant differences                                          |
| Cozean et al. <sup>45</sup>     | EG1: EMG biofeedback during static and dynamic activities<br>EG2: FES during static and dynamic activities<br>EG3: EMG biofeedback+FES during static and dynamic activities | CG: conventional physical therapy                                                                                                                         | knee angle (swing phase)                            | significant differences (p = 0.05) in favour of EG3                 |
| Jonsdottir et al. <sup>47</sup> | EG=Task oriented Gait Training with EMG-BFB device                                                                                                                          | CG= conventional physical therapy (at least 15 minutes of gait training in each session)                                                                  | knee flexion peak                                   | no significant differences                                          |
| Azerpaikan et al. <sup>35</sup> | EG: Neurofeedback training with EEG generator                                                                                                                               | CG: Sham Neuro Feedback Training using sham EEG generator                                                                                                 | limit of stability                                  | significant differences (p = 0.00) in favour of experimental group  |
| Sungkarat, 2011                 | EG: conventional rehabilitation and gait training with I-ShoWS set-up                                                                                                       | CG: conventional rehabilitation and gait training without I-ShoWS set-up                                                                                  | load on paretic leg during stance (% body weight)   | significant differences (p = 0.004) in favour of experimental group |
| Ginis et al. <sup>39</sup>      | EG: received weekly home visit and patients were instructed to walk with the CUPID system                                                                                   | CG: received weekly home visit by the researcher who gave advice on gait and freezing and patients were instructed to walk without using the CUPID system | MinibestTEST                                        | significant differences (p = 0.04) in favour of experimental group  |
| Cho et al. <sup>43</sup>        | EG: visual biofeedback tracking training                                                                                                                                    | CG: not Reported                                                                                                                                          | Modified Motor Assessment Scale (walking item only) | no significant differences                                          |
| Cho et al. <sup>43</sup>        | EG: visual biofeedback tracking training                                                                                                                                    | CG: not Reported                                                                                                                                          | Motoricity Index                                    | no significant differences                                          |
| Ginis et al. <sup>39</sup>      | EG: received weekly home visit and patients were instructed to walk with the CUPID system                                                                                   | CG: received weekly home visit by the researcher who gave advice on gait and freezing and patients were instructed to walk without using the CUPID system | NFOG-Q                                              | no significant differences                                          |

|                                           |                                                                                                   |                                                                                                                                                           |                                                               |                                                                    |
|-------------------------------------------|---------------------------------------------------------------------------------------------------|-----------------------------------------------------------------------------------------------------------------------------------------------------------|---------------------------------------------------------------|--------------------------------------------------------------------|
| <b>Ginis et al.<sup>39</sup></b>          | EG: received weekly home visit and patients were instructed to walk with the CUPID system         | CG: received weekly home visit by the researcher who gave advice on gait and freezing and patients were instructed to walk without using the CUPID system | PASE                                                          | no significant differences                                         |
| <b>Jung et al.<sup>48</sup></b>           | EG: gait training with auditory feedback                                                          | CG: gait training without auditory feedback                                                                                                               | peak force cane                                               | significant differences (p = 0.01) in favour of experimental group |
| <b>Lee et al.<sup>50</sup></b>            | EG: neurofeedback training                                                                        | CG: pseudo-neurofeedback training (sham neurofeedback)                                                                                                    | plantar foot pressure (entire foot-during dual task activity) | significant differences (p < 0.01) in favour of experimental group |
| <b>Lee et al.<sup>50</sup></b>            | EG: neurofeedback training                                                                        | CG: pseudo-neurofeedback training (sham neurofeedback)                                                                                                    | plantar foot pressure (forefoot- during dual task activity)   | significant differences (p < 0.05) in favour of experimental group |
| <b>Lee et al.<sup>50</sup></b>            | EG: neurofeedback training                                                                        | CG: pseudo-neurofeedback training (sham neurofeedback)                                                                                                    | plantar foot pressure (hindfoot-during dual task activity)    | no significant differences                                         |
| <b>Lupo et al.<sup>51</sup></b>           | EG: balance training with RIABLO biofeedback system using a video interface.                      | CG: conventional balance training without the use of the RIABLO biofeedback system                                                                        | RMI                                                           | no significant differences                                         |
| <b>Mandel et al.<sup>52</sup></b>         | EG1: EMG biofeedback training<br>EG2: EMG biofeedback followed by rhythmic positional biofeedback | CG: nothing                                                                                                                                               | ROM (Plantar Flexion)                                         | significant differences (p = 0.01) in favour of EG1                |
| <b>Jung et al.<sup>48</sup></b>           | EG: gait training with auditory feedback                                                          | CG: gait training without auditory feedback                                                                                                               | single leg stance (affected side)                             | significant differences (p = 0.03) in favour of experimental group |
| <b>van den Heuvel et al.<sup>40</sup></b> | EG: interactive balance games with explicit augmented visual feedback                             | CG: conventional balance training recommended by the guidelines for physical therapy.                                                                     | single leg stance test                                        | no significant differences                                         |
| <b>Ki et al.<sup>49</sup></b>             | EG: neuro-developmental treatment with auditory feedback                                          | CG: neuro-developmental treatment                                                                                                                         | single limb stance (affected side)                            | no significant differences                                         |
| <b>Jung et al.<sup>48</sup></b>           | EG: gait training with auditory feedback                                                          | CG: gait training without auditory feedback                                                                                                               | single support time                                           | significant differences (p = 0.02) in favour of experimental group |
| <b>Sunkarat, 2011</b>                     | EG: conventional rehabilitation and gait training with I-ShoWS set-up                             | CG: conventional rehabilitation and gait training without I-ShoWS set-up                                                                                  | single support time asymmetry ratio                           | significant differences (p = 0.03) in favour of experimental group |



|                                       |                                                                                                                                           |                                                                                                                                                           |                                                     |                                                                     |
|---------------------------------------|-------------------------------------------------------------------------------------------------------------------------------------------|-----------------------------------------------------------------------------------------------------------------------------------------------------------|-----------------------------------------------------|---------------------------------------------------------------------|
| <b>Ki et al.<sup>49</sup></b>         | EG: neuro-developmental treatment with auditory feedback                                                                                  | CG: neuro-developmental treatment                                                                                                                         | stance phase duration                               | no significant differences                                          |
| <b>Lee et al.<sup>50</sup></b>        | EG: neurofeedback training                                                                                                                | CG: pseudo-neurofeedback training (sham neurofeedback)                                                                                                    | stance phase percentage (during dual task activity) | no significant differences                                          |
| <b>Byl et al.<sup>36</sup></b>        | EG: visual kinematic feedback on the computer screen during progressive and task oriented balance and gait training activities            | CG: balance and gait training activities                                                                                                                  | step length                                         | no significant differences                                          |
| <b>Intiso et al.<sup>46</sup></b>     | EG: EMG Biofeedback and Physical Therapy (standard exercise bobath, facilitation and inhibition techniques, neurofacilitatory techniques) | CG: Physical therapy (standard exercise bobath, facilitation and inhibition techniques, neurofacilitatory techniques)                                     | step length                                         | no significant differences                                          |
| <b>Sungkarat, 2011</b>                | EG: conventional rehabilitation and gait training with I-ShoWS set-up                                                                     | CG: conventional rehabilitation and gait training without I-ShoWS set-up                                                                                  | step length asymmetry ratio                         | significant differences (p = 0.03) in favour of experimental group  |
| <b>Aruin et al.<sup>41</sup></b>      | EG: Conventional balance and gait therapy combined with auditory biofeedback                                                              | CG: Conventional balance and gait therapy during which patients occasionally received verbal information about BOS                                        | step width                                          | significant differences (p<0.05) in favour of experimental group    |
| <b>El-Tamawy et al.<sup>38</sup></b>  | EG: Individually designed physiotherapy and traditional gait training plus treadmill training with vibratory stimulus                     | CG: individually designed physiotherapy traditional gait training including instructions to walk with long steps.                                         | stride length                                       | significant differences (p = 0.001) in favour of experimental group |
| <b>Ginis et al.<sup>39</sup></b>      | EG: received weekly home visit and patients were instructed to walk with the CUPID system                                                 | CG: received weekly home visit by the researcher who gave advice on gait and freezing and patients were instructed to walk without using the CUPID system | stride length                                       | no significant differences                                          |
| <b>Jonsdottir et al.<sup>47</sup></b> | EG=Task oriented Gait Training with EMG-BFB device                                                                                        | CG= conventional physical therapy (at least 15 minutes of gait training in each session)                                                                  | stride length                                       | significant differences (p = 0.001) in favour of experimental group |
| <b>Ginis et al.<sup>39</sup></b>      | EG: received weekly home visit and patients were instructed to walk with the CUPID system                                                 | CG: received weekly home visit by the researcher who gave advice on gait and freezing and patients were instructed to walk without using the CUPID system | stride length - DT                                  | no significant differences                                          |

|                                           |                                                                                                                                |                                                                                                                                                           |                              |                                                                         |
|-------------------------------------------|--------------------------------------------------------------------------------------------------------------------------------|-----------------------------------------------------------------------------------------------------------------------------------------------------------|------------------------------|-------------------------------------------------------------------------|
| <b>Byl et al.<sup>36</sup></b>            | EG: visual kinematic feedback on the computer screen during progressive and task oriented balance and gait training activities | CG: balance and gait training activities                                                                                                                  | TBS                          | no significant differences                                              |
| <b>Byl et al.<sup>36</sup></b>            | EG: visual kinematic feedback on the computer screen during progressive and task oriented balance and gait training activities | CG: balance and gait training activities                                                                                                                  | TUG                          | no significant differences                                              |
| <b>Ki et al.<sup>49</sup></b>             | EG: neuro-developmental treatment with auditory feedback                                                                       | CG: neuro-developmental treatment                                                                                                                         | TUG                          | significant differences ( $p < 0.01$ ) in favour of experimental group  |
| <b>Carpinella et al.<sup>37</sup></b>     | EG: balance and gait functional tailored exercises using Gamepad System                                                        | CG: personalized balance and gait exercises defined by the clinical staff                                                                                 | UPDRSIII                     | no significant differences                                              |
| <b>Ginis et al.<sup>39</sup></b>          | EG: received weekly home visit and patients were instructed to walk with the CUPID system                                      | CG: received weekly home visit by the researcher who gave advice on gait and freezing and patients were instructed to walk without using the CUPID system | UPDRSIII                     | no significant differences                                              |
| <b>van den Heuvel et al.<sup>40</sup></b> | EG: interactive balance games with explicit augmented visual feedback                                                          | CG: conventional balance training recommended by the guidelines for physical therapy.                                                                     | UPDRSIII                     | significant differences ( $p = 0.02$ ) in favour of experimental group  |
| <b>El-Tamawy et al.<sup>38</sup></b>      | EG: Individually designed physiotherapy and traditional gait training plus treadmill training with vibratory stimuli           | CG: individually designed physiotherapy traditional gait training including instructions to walk with long steps.                                         | walking distance (treadmill) | significant differences ( $p = 0.001$ ) in favour of experimental group |

**Table S2 – Qualitative Synthesis**
